# Supplementary material for: Circulatory health risks from additive multi-pollutant models: short-term exposure to three common air pollutants in Canada
Source: PubMed Central journal article supplement (PMC9908686; doi:10.1007/s11356-022-22947-4), 2022-09-29
Supplement: 11356_2022_22947_MOESM1_ESM.pdf [file 11356_2022_22947_MOESM1_ESM.pdf]

## Supplementary Materials

### Circulatory Health Risks from Additive Multi-pollutant Models: Short-term Exposure to Three Common Air Pollutants in Canada

Hwashin H. Shin<sup>a,b,\*</sup>, James Owen<sup>a</sup>, Aubrey Maquiling<sup>a</sup>, Rajendra P. Parajuli<sup>c</sup>, Marc Smith-Doiron<sup>a</sup>

<sup>a</sup> Environmental Health Science and Research Bureau, Health Canada, Ottawa, ON, Canada

<sup>b</sup> Dept. of Mathematics and Statistics, Queen's University, Kingston, ON, Canada

<sup>c</sup> Central Department of Zoology, Central Campus, Institute of Science & Technology (IOST), Tribhuvan University, Kritipur-1, Kathmandu, Nepal

\*Corresponding author: Hwashin.Shin@ hc-sc.gc.ca

**Note: The order of materials in supplementary follows the order of the main text.**

#### Table of Contents

|                                                                                                                                                                        |   |
|------------------------------------------------------------------------------------------------------------------------------------------------------------------------|---|
| Figure S1. Canada map on the 24 cities selected for the study.....                                                                                                     | 2 |
| Table S1. City-specific annual average concentrations of Ozone, NO <sub>2</sub> , PM <sub>2.5</sub> , and temperature concentrations by season for 2001-2012.....      | 3 |
| Table S2. City-specific annual average Pearson's correlations between Ozone, NO <sub>2</sub> , and PM <sub>2.5</sub> for 2001-2012.....                                | 4 |
| Table S3. City-specific annual average of respiratory mortality ratio to population by sex and age (2001-2012).....                                                    | 5 |
| Figure S2 Annual Pearson correlation between three air pollutants for 2001-2012 by season ....                                                                         | 5 |
| Figure S3 Diagram on significance of associations between 3 air pollutants and circulatory hospitalization and mortality, respectively, by model, season and lag ..... | 6 |

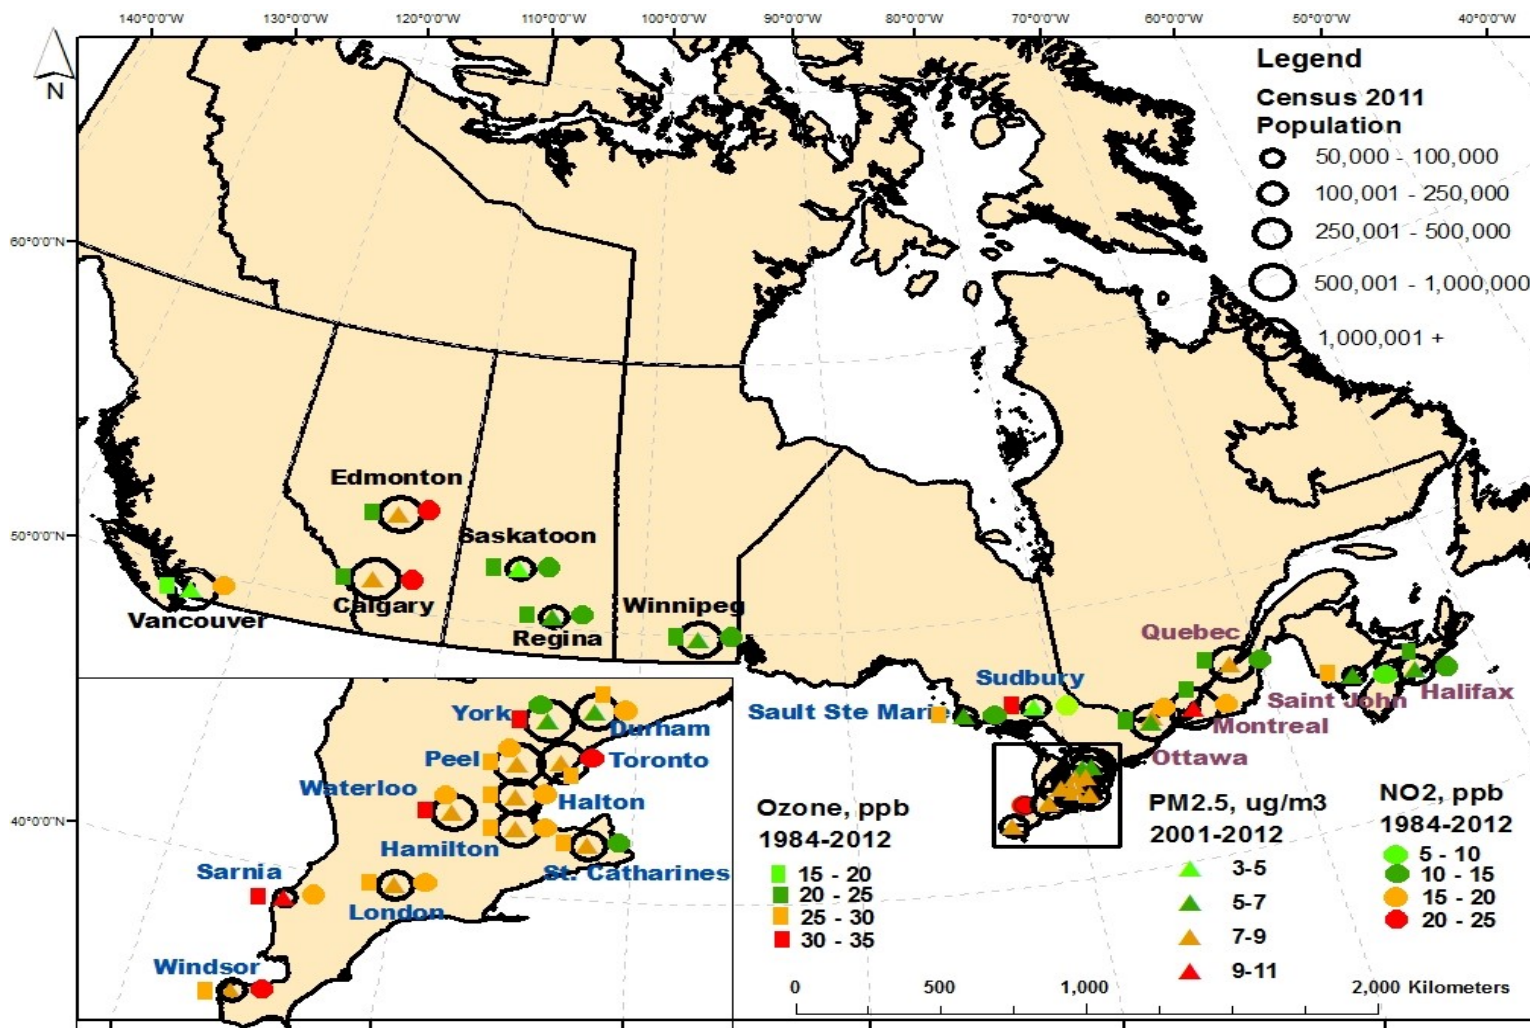

**Figure S1:** Canada map on the 24 cities selected for the study. (1) empty circle size: population size; (2) shape: solid square (ozone), solid circle (NO<sub>2</sub>) and solid triangle (PM<sub>2.5</sub>); and (3) color: concentrations in 4 levels of low to high in green to red

Table S1. City-specific annual average concentrations of Ozone, NO<sub>2</sub>, PM<sub>2.5</sub>, and temperature concentrations by season for 2001-2012

| City                  | Ozone <sup>a</sup> in ppb (SD <sup>b</sup> ) |                   | NO <sub>2</sub> <sup>c</sup> in ppb (SD) |                   | PM <sub>2.5</sub> <sup>d</sup> in µg/m <sup>3</sup> (SD) |                   | Temperature <sup>e</sup> in °C (SD) |                   |
|-----------------------|----------------------------------------------|-------------------|------------------------------------------|-------------------|----------------------------------------------------------|-------------------|-------------------------------------|-------------------|
|                       | Warm <sup>f</sup>                            | Cold <sup>f</sup> | Warm <sup>f</sup>                        | Cold <sup>f</sup> | Warm <sup>f</sup>                                        | Cold <sup>f</sup> | Warm <sup>f</sup>                   | Cold <sup>f</sup> |
| Halifax               | 26 (3.9)                                     | 27 (2.7)          | 12 (3.8)                                 | 13 (4.3)          | 6 (0.9)                                                  | 4 (1.1)           | 14 (0.6)                            | 1 (1.0)           |
| Saint John            | 32 (1.0)                                     | <b>32</b> (1.1)   | 7 (3.0)                                  | 6 (2.3)           | 7 (1.4)                                                  | 5 (1.0)           | 12 (0.5)                            | 0 (1.0)           |
| Quebec City           | 33 (2.4)                                     | 26 (1.2)          | 9 (1.8)                                  | 14 (2.9)          | 8 (0.7)                                                  | 9 (1.4)           | 15 (0.6)                            | -4 (1.2)          |
| Montreal              | 35 (2.1)                                     | 23 (1.4)          | 13 (2.9)                                 | 18 (2.9)          | 9 (1.0)                                                  | <b>10</b> (1.6)   | 16 (0.7)                            | -2 (1.3)          |
| Ottawa                | 37 (2.9)                                     | 27 (2.5)          | 9 (5.8)                                  | 14 (5.3)          | 7 (1.6)                                                  | 6 (1.3)           | 16 (0.6)                            | -2 (1.1)          |
| Durham                | 41 (3.0)                                     | 29 (2.0)          | 9 (4.9)                                  | 12 (4.2)          | 8 (1.9)                                                  | 6 (1.1)           | 16 (0.7)                            | 0 (1.2)           |
| York                  | 45 (2.7)                                     | <b>32</b> (1.2)   | 7 (1.5)                                  | 11 (1.8)          | 8 (1.7)                                                  | 5 (0.9)           | 17 (0.7)                            | 0 (1.1)           |
| Toronto               | 41 (2.4)                                     | 25 (1.2)          | <b>18</b> (3.4)                          | 21 (2.8)          | 9 (1.6)                                                  | 6 (0.9)           | 17 (0.7)                            | 2 (1.0)           |
| Peel                  | 43 (2.4)                                     | 28 (1.3)          | 12 (3.3)                                 | 17 (3.4)          | 9 (1.7)                                                  | 6 (0.9)           | 17 (0.9)                            | 1 (1.2)           |
| Halton                | 44 (2.9)                                     | 28 (1.4)          | 12 (2.7)                                 | 15 (2.3)          | 9 (2.2)                                                  | 6 (1.0)           | 17 (0.7)                            | 2 (1.0)           |
| Hamilton              | 43 (2.4)                                     | 27 (2.3)          | 14 (3.8)                                 | 16 (3.4)          | 10 (1.9)                                                 | 7 (1.0)           | 16 (0.7)                            | 1 (1.1)           |
| Niagara               | 44 (2.7)                                     | 28 (2.7)          | 10 (3.2)                                 | 13 (3.2)          | 9 (1.5)                                                  | 6 (0.7)           | 17 (0.6)                            | 2 (1.0)           |
| Waterloo              | 45 (2.8)                                     | 30 (1.7)          | 8 (2.3)                                  | 13 (2.9)          | 9 (1.5)                                                  | 6 (0.8)           | 16 (0.6)                            | 0 (1.2)           |
| Windsor               | <b>47</b> (2.9)                              | 25 (3.4)          | 14 (3.2)                                 | 19 (2.8)          | 11 (1.7)                                                 | 7 (0.7)           | <b>18</b> (0.7)                     | 2 (1.0)           |
| Sarnia                | 45 (3.1)                                     | 29 (2.3)          | 10 (3.3)                                 | 13 (3.1)          | <b>13</b> (1.4)                                          | <b>10</b> (0.9)   | 17 (0.6)                            | 1 (1.1)           |
| London                | 44 (2.9)                                     | 27 (2.0)          | 10 (3.0)                                 | 14 (3.8)          | 10 (2.5)                                                 | 7 (1.9)           | 16 (0.7)                            | 1 (1.1)           |
| Sudbury               | 39 (2.8)                                     | <b>32</b> (1.6)   | 6 (0.7)                                  | 10 (1.2)          | NA <sup>h</sup>                                          | NA                | 14 (0.8)                            | -5 (1.1)          |
| Sault Sainte Marie    | 39 (2.3)                                     | <b>32</b> (1.1)   | 5 (2.0)                                  | 8 (2.6)           | NA                                                       | NA                | 14 (0.8)                            | -3 (1.2)          |
| Winnipeg              | 34 (3.6)                                     | 25 (2.3)          | 6 (1.5)                                  | 11 (1.7)          | 6 (0.9)                                                  | 5 (0.8)           | 15 (1.1)                            | -7 (1.4)          |
| Regina                | 30 (5.5)                                     | 21 (4.8)          | 9 (1.6)                                  | 14 (2.2)          | 7 (1.8)                                                  | 5 (1.3)           | 13 (0.9)                            | <b>-8</b> (1.2)   |
| Saskatoon             | 33 (2.5)                                     | 24 (1.9)          | 8 (1.5)                                  | 14 (1.2)          | NA                                                       | NA                | 13 (0.9)                            | <b>-8</b> (1.1)   |
| Calgary               | 36 (2.0)                                     | 24 (1.8)          | 14 (3.4)                                 | <b>25</b> (3.0)   | 8 (2.4)                                                  | 7 (2.1)           | 12 (0.8)                            | -3 (0.9)          |
| Edmonton              | 37 (1.9)                                     | 23 (1.5)          | 12 (2.9)                                 | 23 (3.4)          | 7 (2.1)                                                  | 8 (3.1)           | 12 (0.7)                            | -6 (1.1)          |
| Vancouver             | 29 (1.2)                                     | 21 (2.0)          | 12 (1.7)                                 | 16 (1.8)          | 5 (0.5)                                                  | 5 (0.8)           | 14 (0.7)                            | 6 (0.8)           |
| Combined <sup>g</sup> | 38 (6.0)                                     | 27 (3.3)          | 10 (3.1)                                 | 15 (4.3)          | 8 (1.9)                                                  | 6 (1.7)           | 15 (1.8)                            | -1 (3.4)          |

<sup>a</sup> Ozone concentrations were calculated using the imputed daily rolling average of the maximum eight hours.

<sup>b</sup> SD: standard deviation of 12-year annual averages.

<sup>c</sup> NO<sub>2</sub> concentrations were calculated using the imputed 24-hour daily average.

<sup>d</sup> PM<sub>2.5</sub> concentrations were calculated using the imputed unadjusted 24-hour daily average.

<sup>e</sup> Temperature concentrations were calculated using 24-hour daily average.

<sup>f</sup> Warm (April to September); Cold (October to March).

<sup>g</sup> Average (SD) over 24 cities.

<sup>h</sup> PM<sub>2.5</sub> concentrations are not available due to limited data in Sudbury, Sault Sainte Marie, and Saskatoon.

Table S2. City-specific annual average Pearson's correlations between Ozone, NO<sub>2</sub>, and PM<sub>2.5</sub> for 2001-2012

| City <sup>a</sup>     | Ozone & NO <sub>2</sub> (SD) |                   |                   | Ozone & PM <sub>2.5</sub> (SD) |                   |                   | PM <sub>2.5</sub> & NO <sub>2</sub> (SD) |                               |                   |
|-----------------------|------------------------------|-------------------|-------------------|--------------------------------|-------------------|-------------------|------------------------------------------|-------------------------------|-------------------|
|                       | Warm <sup>b</sup>            | Cold <sup>b</sup> | Year <sup>b</sup> | Warm <sup>b</sup>              | Cold <sup>b</sup> | Year <sup>b</sup> | Warm <sup>b</sup>                        | Cold <sup>b</sup>             | Year <sup>b</sup> |
| Halifax               | -0.1 (0.13)                  | -0.2 (0.15)       | -0.1 (0.09)       | 0.3 (0.17)                     | 0.1 (0.21)        | 0.2 (0.18)        | 0.1 (0.19)                               | 0.1 (0.14)                    | 0.1 (0.16)        |
| Saint John            | 0.3 (0.15)                   | 0.0 (0.21)        | 0.1 (0.14)        | 0.3 (0.09)                     | 0.1 (0.16)        | 0.2 (0.08)        | 0.4 (0.15)                               | 0.5 (0.16)                    | 0.4 (0.13)        |
| Quebec City           | 0.2 (0.08)                   | -0.3 (0.12)       | -0.2 (0.06)       | 0.5 (0.13)                     | -0.3 (0.11)       | 0.1 (0.13)        | 0.4 (0.09)                               | <b>0.8 (0.08)<sup>d</sup></b> | 0.6 (0.09)        |
| Montreal              | 0.3 (0.10)                   | -0.2 (0.11)       | -0.2 (0.07)       | 0.6 (0.08)                     | -0.3 (0.10)       | 0.2 (0.15)        | 0.4 (0.08)                               | <b>0.8 (0.04)</b>             | 0.6 (0.10)        |
| Ottawa                | 0.3 (0.10)                   | -0.3 (0.10)       | -0.2 (0.07)       | 0.6 (0.11)                     | -0.2 (0.09)       | 0.3 (0.10)        | 0.3 (0.13)                               | <b>0.7 (0.09)</b>             | 0.4 (0.09)        |
| Durham                | 0.3 (0.15)                   | -0.3 (0.18)       | -0.1 (0.09)       | <b>0.7 (0.14)</b>              | -0.1 (0.22)       | 0.5 (0.10)        | 0.4 (0.16)                               | 0.6 (0.23)                    | 0.4 (0.17)        |
| York                  | 0.3 (0.09)                   | -0.3 (0.15)       | -0.2 (0.08)       | <b>0.7 (0.07)</b>              | 0.0 (0.15)        | 0.5 (0.10)        | 0.3 (0.07)                               | 0.6 (0.09)                    | 0.3 (0.06)        |
| Toronto               | 0.3 (0.08)                   | -0.2 (0.13)       | -0.1 (0.06)       | <b>0.7 (0.07)</b>              | -0.1 (0.14)       | 0.5 (0.08)        | 0.4 (0.08)                               | 0.6 (0.06)                    | 0.4 (0.06)        |
| Peel                  | 0.1 (0.08)                   | -0.3 (0.11)       | -0.2 (0.05)       | <b>0.7 (0.07)</b>              | -0.1 (0.12)       | 0.5 (0.09)        | 0.3 (0.07)                               | 0.6 (0.07)                    | 0.3 (0.06)        |
| Halton                | 0.2 (0.07)                   | -0.3 (0.13)       | -0.1 (0.07)       | <b>0.7 (0.07)</b>              | -0.1 (0.14)       | 0.5 (0.10)        | 0.3 (0.11)                               | 0.6 (0.09)                    | 0.4 (0.09)        |
| Hamilton              | -0.1 (0.10)                  | -0.3 (0.12)       | -0.3 (0.08)       | 0.6 (0.11)                     | -0.1 (0.14)       | 0.5 (0.11)        | 0.3 (0.13)                               | 0.6 (0.12)                    | 0.3 (0.12)        |
| Niagara               | 0.0 (0.17)                   | -0.1 (0.16)       | -0.2 (0.10)       | <b>0.7 (0.08)</b>              | 0.0 (0.12)        | 0.5 (0.08)        | 0.1 (0.17)                               | 0.4 (0.23)                    | 0.1 (0.18)        |
| Waterloo              | 0.2 (0.15)                   | -0.2 (0.14)       | -0.2 (0.08)       | <b>0.7 (0.10)</b>              | 0.0 (0.14)        | 0.5 (0.10)        | 0.2 (0.15)                               | 0.5 (0.13)                    | 0.2 (0.11)        |
| Windsor               | 0.2 (0.12)                   | -0.2 (0.15)       | -0.3 (0.06)       | <b>0.7 (0.07)</b>              | 0.0 (0.15)        | 0.5 (0.10)        | 0.3 (0.09)                               | 0.5 (0.09)                    | 0.2 (0.08)        |
| Sarnia                | 0.5 (0.06)                   | -0.3 (0.15)       | 0.0 (0.10)        | <b>0.7 (0.08)</b>              | -0.2 (0.15)       | 0.4 (0.10)        | 0.6 (0.08)                               | <b>0.7 (0.08)</b>             | 0.5 (0.09)        |
| London                | 0.4 (0.09)                   | -0.1 (0.16)       | -0.2 (0.06)       | 0.6 (0.18)                     | 0.1 (0.14)        | 0.5 (0.07)        | 0.3 (0.18)                               | 0.5 (0.26)                    | 0.2 (0.18)        |
| Sudbury               | 0.2 (0.12)                   | 0.1 (0.04)        | -0.1 (0.05)       | NA <sup>c</sup>                | NA                | NA                | NA                                       | NA                            | NA                |
| Sault Sainte Marie    | 0.2 (0.12)                   | -0.1 (0.22)       | -0.1 (0.10)       | NA                             | NA                | NA                | NA                                       | NA                            | NA                |
| Winnipeg              | 0.3 (0.12)                   | -0.2 (0.17)       | -0.2 (0.09)       | 0.3 (0.13)                     | -0.2 (0.12)       | 0.3 (0.14)        | 0.3 (0.13)                               | 0.4 (0.17)                    | 0.2 (0.15)        |
| Regina                | 0.1 (0.16)                   | -0.1 (0.23)       | -0.2 (0.15)       | 0.2 (0.21)                     | -0.1 (0.16)       | 0.2 (0.15)        | 0.0 (0.17)                               | 0.2 (0.17)                    | 0.0 (0.17)        |
| Saskatoon             | 0.1 (0.18)                   | -0.1 (0.19)       | -0.3 (0.13)       | NA                             | NA                | NA                | NA                                       | NA                            | NA                |
| Calgary               | 0.1 (0.13)                   | -0.4 (0.10)       | -0.5 (0.07)       | 0.3 (0.13)                     | -0.5 (0.10)       | 0.0 (0.18)        | 0.3 (0.17)                               | 0.5 (0.11)                    | 0.2 (0.15)        |
| Edmonton              | 0.2 (0.12)                   | -0.4 (0.11)       | -0.5 (0.07)       | 0.3 (0.14)                     | -0.4 (0.13)       | -0.1 (0.13)       | 0.4 (0.11)                               | 0.5 (0.10)                    | 0.4 (0.11)        |
| Vancouver             | 0.1 (0.14)                   | -0.5 (0.13)       | -0.4 (0.11)       | 0.2 (0.11)                     | -0.6 (0.09)       | -0.1 (0.17)       | <b>0.7 (0.08)</b>                        | 0.6 (0.08)                    | 0.5 (0.10)        |
| Combined <sup>c</sup> | 0.2 (0.13)                   | -0.2 (0.14)       | -0.2 (0.13)       | 0.5 (0.18)                     | -0.1 (0.18)       | 0.3 (0.20)        | 0.3 (0.14)                               | 0.5 (0.16)                    | 0.3 (0.16)        |

<sup>a</sup> Cities are ordered geographically from east to west.

<sup>b</sup> Warm (April to September); Cold (October to March); Year (January to December).

<sup>c</sup> Average over 24 cities.

<sup>d</sup> Bold indicates high correlation  $\geq 0.7$ .

<sup>e</sup> Pearson's correlation is not available due to limited PM<sub>2.5</sub> data in Sudbury, Sault Sainte Marie, and Saskatoon.

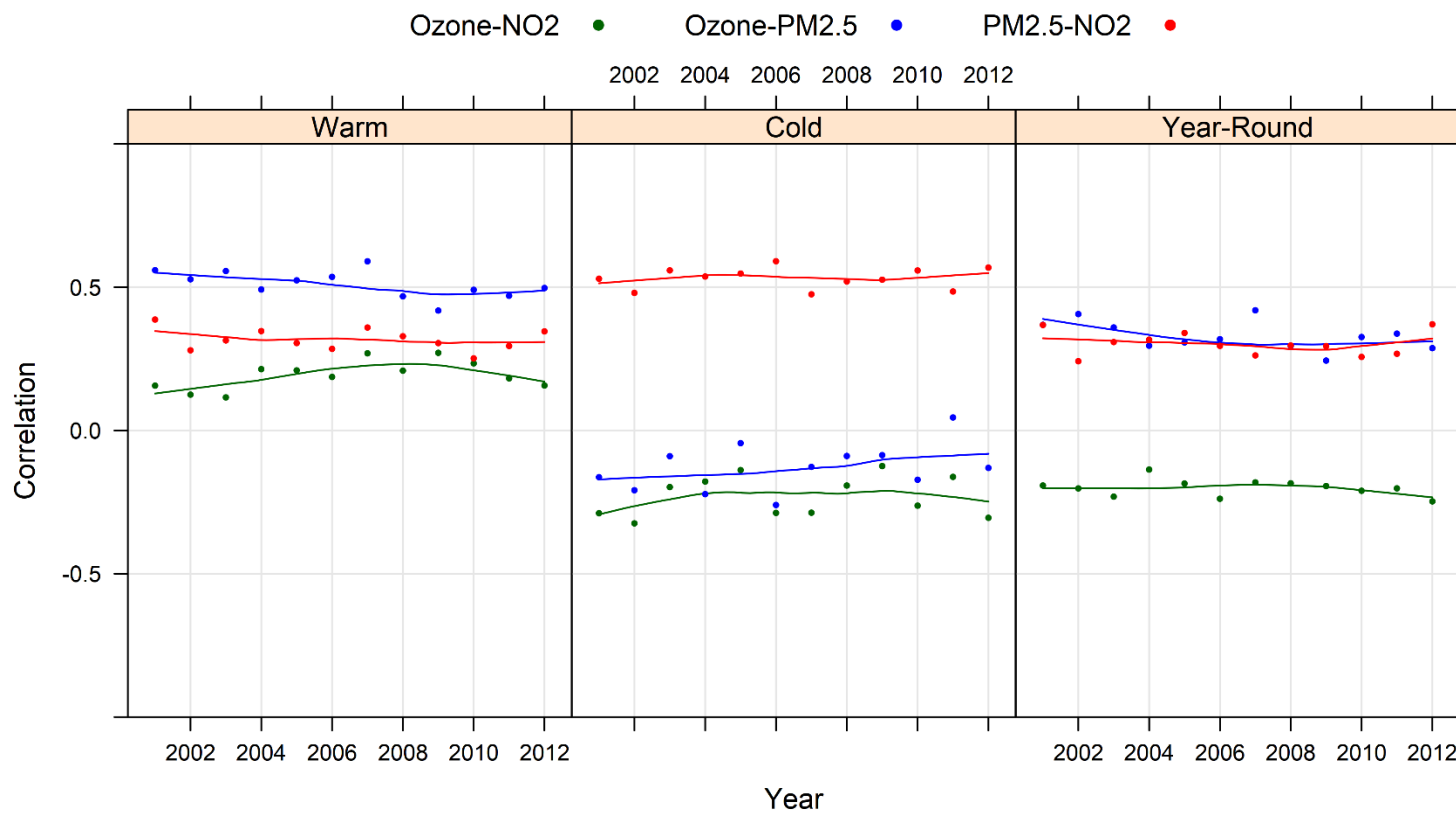

**Figure S2:** Annual Pearson correlation between three air pollutants for 2001-2012 by season: (left) warm season (April to September); (middle) cold season (October to March); and (right) year-round (January to December). In color, (green) correlation between ozone and NO<sub>2</sub>, (blue) correlation between ozone and PM<sub>2.5</sub>, and (red) correlation between NO<sub>2</sub> and PM<sub>2.5</sub>. Lines are generated by a LOESS smoother (span = 0.75, degree= 1)

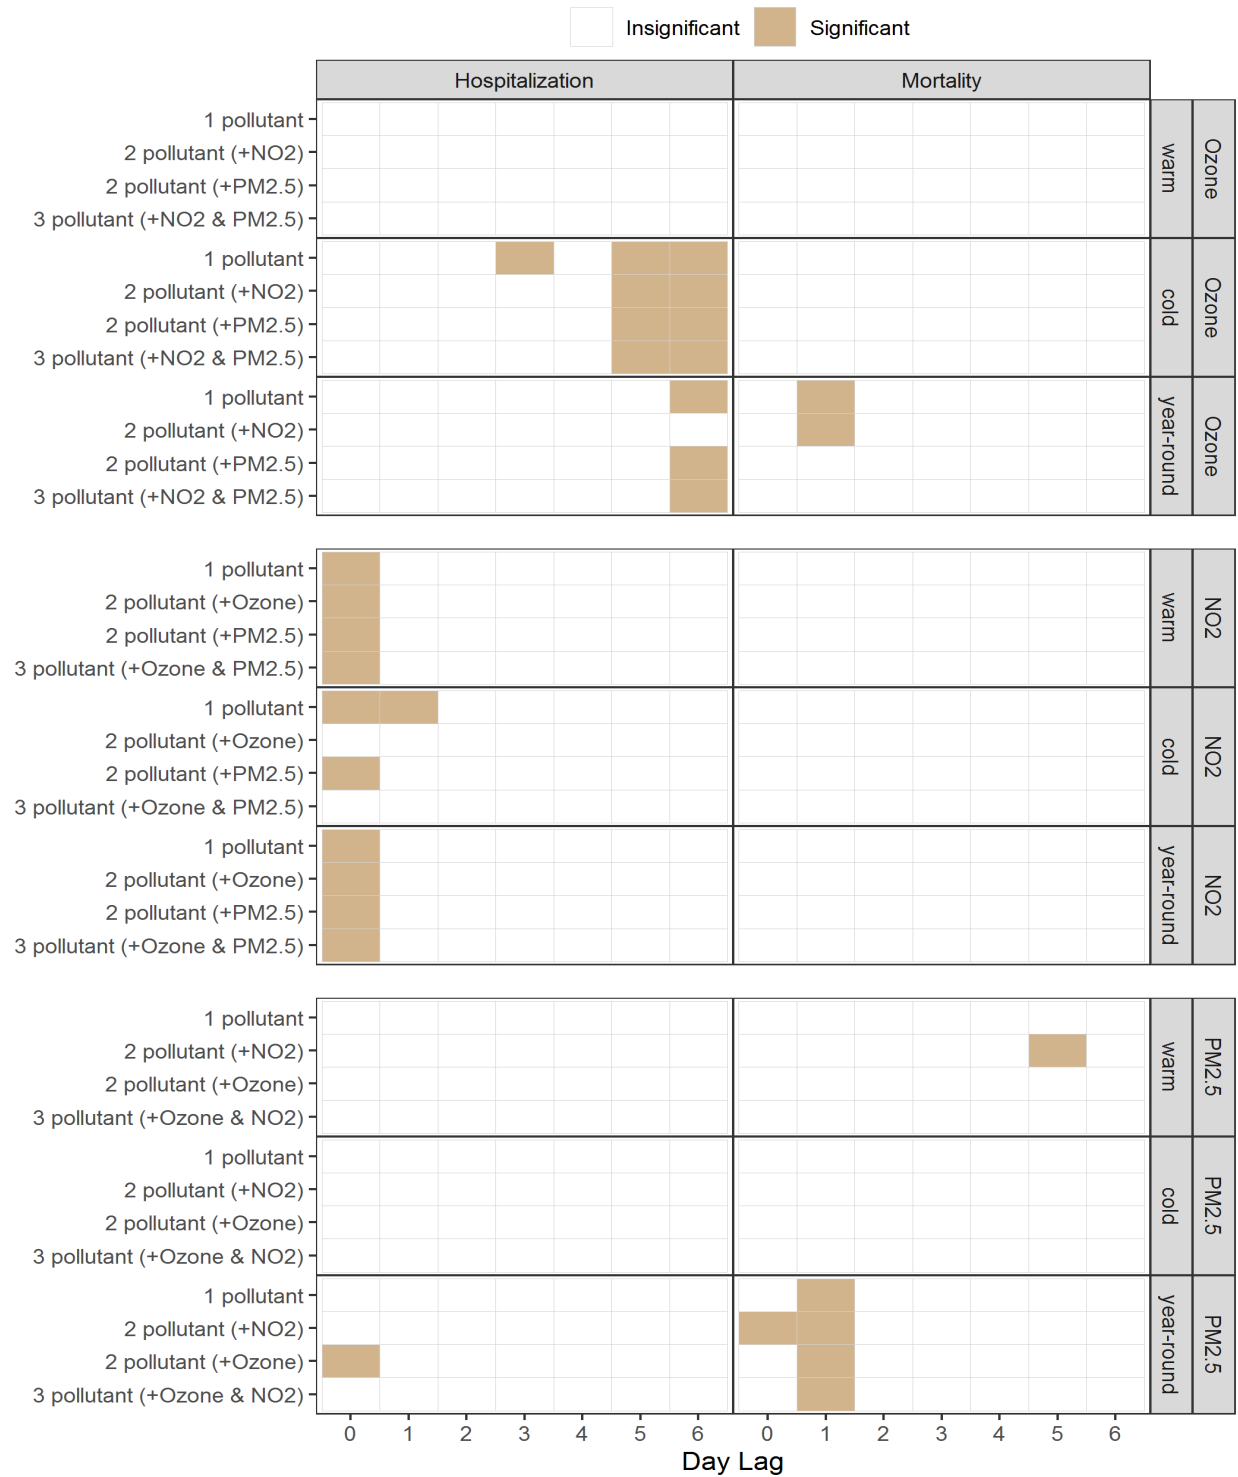

**Figure S3:** Diagram on significance of associations between 3 air pollutants and circulatory hospitalization and mortality, respectively, by model, season and lag: (a) 4 models of 1-, 2-, or 3-pollutants together; (b) 3 seasons of warm (Apr to Sept), cold (Oct to Mar) and year-round (Jan to Dec); and (c) 7 lags of 0- to 6-day lagged air pollutant. The highlighted indicate significance, and the blank does insignificance
